# Supplementary material for: Bone Marrow CX3CL1/Fractalkine is a New Player of the Pro-Angiogenic Microenvironment in Multiple Myeloma Patients
Source: MDPI journal article supplement (doi:10.3390/cancers11030321), 2019-03-06

**SUPPLEMENTAL FIGURE S1: Evaluation of CX3CL1 bone marrow levels in myeloma patients with or without bone disease.** BM CX3CL1 plasma levels in multiple myeloma patients (A) with (W) or without (W/O) osteolytic lesions ( $P = 0.34$ , not significant (NS)) or (B) the presence of high bone disease (HBD) compared to low bone disease (LBD) ( $P = 0.78$ , NS).

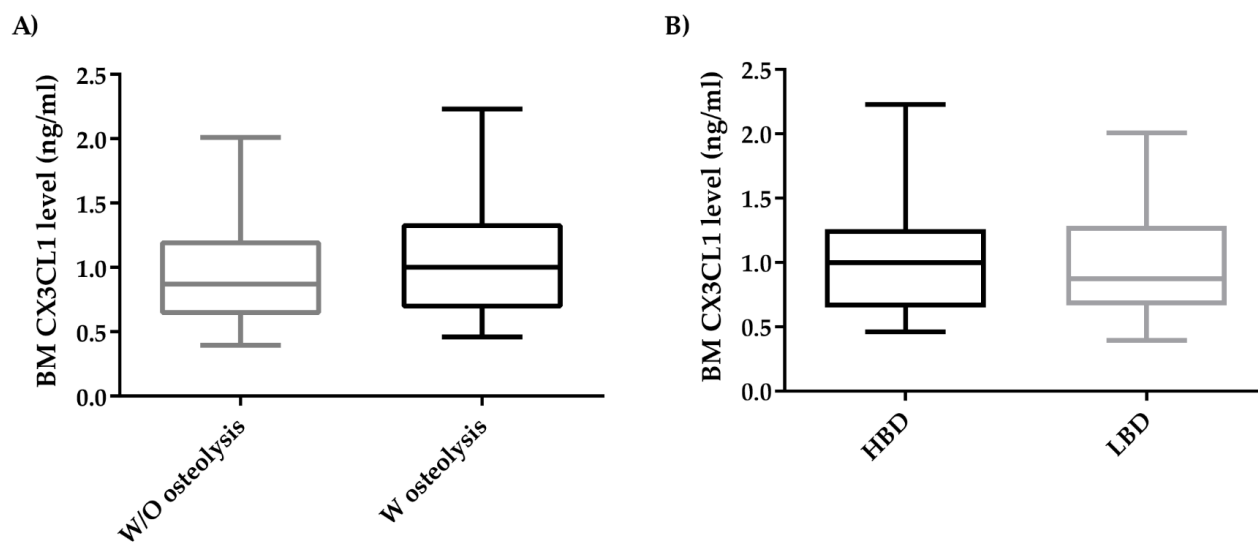

Supplement: s1 [file s1]
