# Supplementary material for: Bone Marrow CX3CL1/Fractalkine is a New Player of the Pro-Angiogenic Microenvironment in Multiple Myeloma Patients
Source: MDPI journal article supplement (doi:10.3390/cancers11030321), 2019-03-06
Supplement: s1 [file s1]

**Supplemental Table S1:** Clinical Characteristic of patients

| DIAGNOSIS | STAGE | ISS | GENDER | AGE | LIGHT CHAINS | OSTEOLYSIS | HBD/LBD |
|-----------|-------|-----|--------|-----|--------------|------------|---------|
| HD-1      |       |     | F      | 34  | -            | -          | -       |
| HD-2      |       |     | M      | 68  | -            | -          | -       |
| HD-3      |       |     | M      | 66  | -            | -          | -       |
| HD-4      |       |     | F      | 66  | -            | -          | -       |
| HD-5      |       |     | M      | 64  | -            | -          | -       |
| HD-6      |       |     | M      | 64  | -            | -          | -       |
| HD-7      |       |     | M      | 74  | -            | -          | -       |
| HD-8      |       |     | M      | 74  | -            | -          | -       |
| HD-9      |       |     | M      | 69  | -            | -          | -       |
| HD-10     |       |     | M      | 54  | -            | -          | -       |
|           |       |     |        |     |              |            |         |
| MGUS-1    |       |     | M      | 72  | k            | -          | -       |
| MGUS-2    |       |     | F      | 43  | l            | -          | -       |
| MGUS-3    |       |     | M      | 42  | k            | -          | -       |
| MGUS-4    |       |     | M      | 66  | l            | -          | -       |
| MGUS-5    |       |     | M      | 78  | k            | -          | -       |
| MGUS-6    |       |     | F      | 54  | l            | -          | -       |
| MGUS-7    |       |     | M      | 77  | k            | -          | -       |
| MGUS-8    |       |     | M      | 43  | k            | -          | -       |
| MGUS-9    |       |     | F      | 72  | k            | -          | -       |
| MGUS-10   |       |     | M      | 46  | l            | -          | -       |
| MGUS-11   |       |     | M      | 57  | k            | -          | -       |
| MGUS-12   |       |     | M      | 67  | k            | -          | -       |
| MGUS-13   |       |     | M      | 61  | -            | -          | -       |
| MGUS-14   |       |     | F      | 55  | k            | -          | -       |
| MGUS-15   |       |     | F      | 77  | k            | -          | -       |
| MGUS-16   |       |     | M      | 73  | k            | -          | -       |
|           |       |     |        |     |              |            |         |
| SMM-1     |       |     | F      | 38  | k            | -          | -       |
| SMM-2     |       |     | F      | 68  | k            | -          | -       |
| SMM-3     |       |     | F      | 67  | l            | -          | -       |
| SMM-4     |       |     | F      | 69  | l            | -          | -       |
| SMM-5     |       |     | M      | 76  | k            | -          | -       |
| SMM-6     |       |     | M      | 58  | k            | -          | -       |
| SMM-7     |       |     | F      | 64  | k            | -          | -       |
| SMM-8     |       |     | F      | 41  | k            | -          | -       |
| SMM-9     |       |     | F      | 51  | l            | -          | -       |
| SMM-10    |       |     | F      | 70  | k            | -          | -       |
| SMM-11    |       |     | M      | 83  | k            | -          | -       |
| SMM-12    |       |     | M      | -   | -            | -          | -       |

|        |    |     |   |    |   |     |     |
|--------|----|-----|---|----|---|-----|-----|
| SMM-13 |    |     | M | 70 | k | -   | -   |
| SMM-14 |    |     | F | 65 | k | -   | -   |
| SMM-15 |    |     | F | 75 | l | -   | -   |
| SMM-16 |    |     | M | 58 | k | -   | -   |
| SMM-17 |    |     | M | 57 | k | -   | -   |
| SMM-18 |    |     | M | 80 | k | -   | -   |
| SMM-19 |    |     | M | 71 | k | -   | -   |
| SMM-20 |    |     | M | 81 | k | -   | -   |
| SMM-21 |    |     | M | 80 | k | -   | -   |
| SMM-22 |    |     | M | 93 | k | -   | -   |
| SMM-23 |    |     | M | 63 | k | -   | -   |
| SMM-24 |    |     | F | 57 | k | -   | -   |
| SMM-25 |    |     | F | 81 | k | -   | -   |
|        |    |     |   |    |   |     |     |
| MM-1   | ND | III | F | 67 | l | YES | LBD |
| MM-2   | ND | II  | M | 65 | l | NO  |     |
| MM-3   | ND | II  | M | 55 | k | YES | HBD |
| MM-4   | ND | II  | M | 68 | k | NO  |     |
| MM-5   | ND | II  | F | 79 | k | NO  |     |
| MM-6   | ND | III | F | 60 | l | YES | HBD |
| MM-7   | ND | I   | M | 62 | k | NO  |     |
| MM-8   | ND | III | F | 75 | l | YES | NA  |
| MM-9   | ND | III | F | 72 | k | YES | HBD |
| MM-10  | ND | I   | F | 61 | k | NO  |     |
| MM-11  | ND | III | M | 73 | k | NO  |     |
| MM-12  | ND | III | M | 84 | l | YES | LBD |
| MM-13  | ND | III | F | 73 | l | YES | HBD |
| MM-14  | ND | I   | M | 53 | k | YES | HBD |
| MM-15  | ND | II  | F | 70 | k | YES | HBD |
| MM-16  | ND | I   | F | 80 | k | YES | HBD |
| MM-17  | ND | II  | F | 88 | l | NO  |     |
| MM-18  | ND | III | M | 58 | k | YES | HBD |
| MM-19  | ND | II  | F | 83 | k | NO  |     |
| MM-20  | ND | II  | F | 71 | k | YES | HBD |
| MM-21  | ND | III | M | 69 | l | YES | HBD |
| MM-22  | ND | II  | F | 78 | l | YES | NA  |
| MM-23  | ND | II  | M | 78 | l | YES | HBD |
| MM-24  | ND | I   | F | 62 | k | YES | NA  |
| MM-25  | ND | I   | M | 76 | k | YES | LBD |
| MM-26  | ND | III | F | 86 | l | NO  |     |
| MM-27  | ND | III | F | 89 | k | NO  |     |
| MM-28  | ND | I   | M | 70 | k | YES | HBD |
| MM-29  | ND | III | F | 73 |   | NO  |     |

|       |    |     |   |    |   |     |     |
|-------|----|-----|---|----|---|-----|-----|
| MM-30 | ND | II  | M | 67 | k | NO  |     |
| MM-31 | ND | III | M | 88 | k | YES | HBD |
| MM-32 | ND | III | F | 88 | k | NO  |     |
| MM-33 | ND | III | M | 72 | k | YES | HBD |
| MM-34 | ND | III | M | 76 | l | YES | HBD |
| MM-35 | ND | II  | F | 73 | l | YES | HBD |
| MM-36 | ND | II  | F | 71 | k | NO  |     |
| MM-37 | ND | II  | F | 52 | k | NO  |     |
| MM-38 | ND | III | M | 85 | k | YES | HBD |
| MM-39 | ND | III | F | 74 | k | YES | NA  |
| MM-40 | ND | II  | M | 77 | l | YES | HBD |
| MM-41 | ND | III | M | 79 | l | NO  |     |
| MM-42 | ND | III | F | 86 | l | YES | HBD |
| MM-43 | ND | III | M | 68 | k | NA  |     |
| MM-44 | ND | III | F | 74 | k | YES | NA  |
| MM-45 | ND | III | M | 88 | l | NA  |     |
| MM-46 | ND | I   | F | 53 | k | YES | HBD |
| MM-47 | ND | II  | F | 79 | l | YES | LBD |
| MM-48 | ND | III | F | 84 | k | NA  |     |
| MM-49 | ND | III | M | 77 | l | NA  |     |
| MM-50 | R  | I   | F | 77 | l | NO  |     |
| MM-51 | R  | II  | F | 59 | k | YES | HBD |
| MM-52 | R  | II  | M | 82 | k | NA  |     |
| MM-53 | R  | III | M | 73 | l | YES | LBD |
| MM-54 | R  | III | M | 80 | k | NO  |     |
| MM-55 | R  | III | F | 82 | k | YES | HBD |
| MM-56 | R  | I   | M | 67 | l | NO  |     |
| MM-57 | R  | I   | F | 70 | k | YES | HBD |
| MM-58 | R  | I   | F | 84 | k | NA  |     |
| MM-59 | R  | II  | M | 74 | l | YES | HBD |
| MM-60 | R  | III | F | 72 | k | YES | NA  |
| MM-61 | R  | II  | F | 71 | k | YES | HBD |
| MM-62 | R  | I   | F | 67 |   | NO  |     |
| MM-63 | R  | I   | M | 70 | k | YES | HBD |
| MM-64 | R  | III | F | 69 | k | NO  |     |
| MM-65 | R  | III | F | 84 | k | NO  |     |
| MM-66 | R  | I   | M | 61 | k | NO  |     |
| MM-67 | R  | I   | F | 65 | l | NO  |     |
| MM-68 | R  | I   | M | 70 | k | NO  |     |
| MM-69 | R  | III | M | 63 | l | NA  |     |
| MM-70 | R  | III | M | 74 | k | YES | HBD |

**Abbreviations:** MGUS: Monoclonal Gammopathy of Undetermined Significance; SMM: Smoldering Multiple Myeloma; MM: Multiple Myeloma; ND: Newly Diagnosed; R: Relapsed; F: female; M: male; ISS: International Staging System; HBD: High Bone Disease; LBD: Low Bone Disease.
